# Supplementary material
Source: PubMed Central journal article supplement (PMC6050085)
Supplement: NIHMS956250-supplement-2.pdf [file NIHMS956250-supplement-2.pdf]

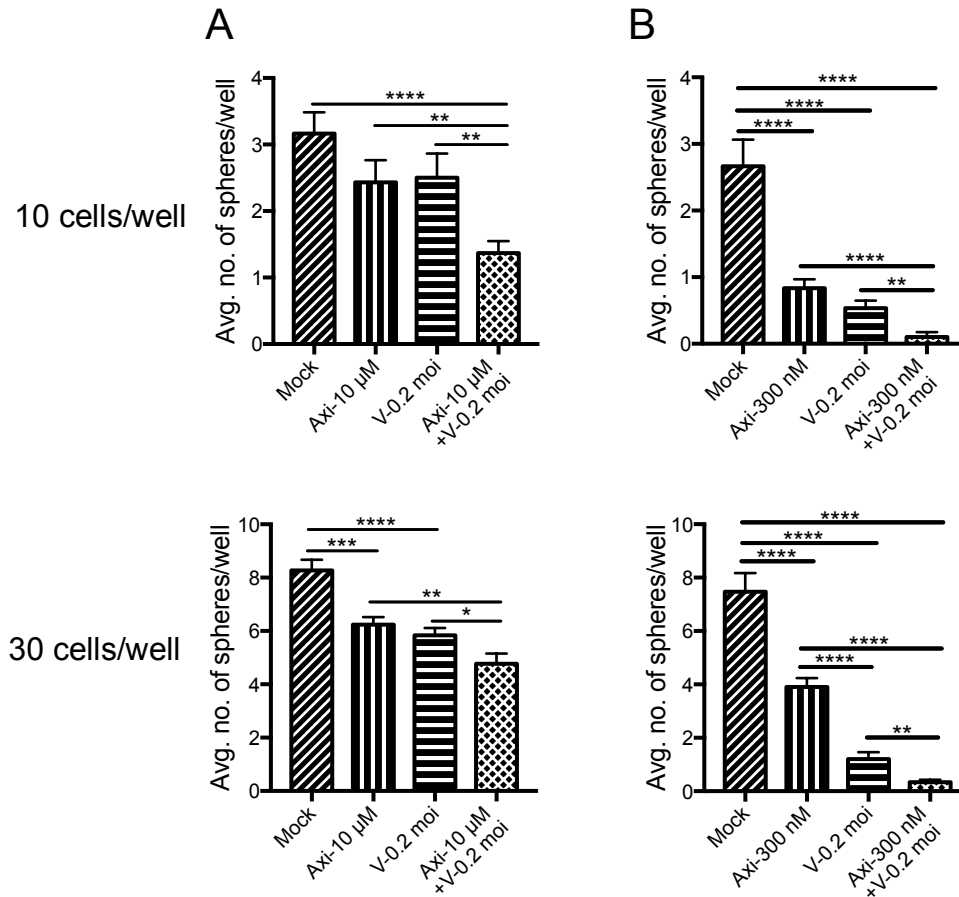

**Supplementary Figure 2. Effects of axitinib and/or G47 $\Delta$ -mIL12 on GBM stem-like population.** **A.** 005 GSCs were shortly exposed to axitinib (10  $\mu$ M) and/or G47 $\Delta$ -mIL12 (moi 0.2) for 12 hr. Cells were then washed, and seeded at 10 and 30 cells/well in a 96-well plate and average number of spheres/well were counted after 12 days of incubation. **B.** 005 cells were continuously exposed to non-toxic concentration of axitinib (300 nM) and/or G47 $\Delta$ -mIL12 (moi 0.2) for 12 days and average number of spheres/well were counted. Mean  $\pm$  SEM. \*  $P < 0.05$ , \*\*  $P < 0.01$ , \*\*\*  $P < 0.001$ , \*\*\*\*  $P < 0.0001$ .
