# Supplementary material
Source: PubMed Central journal article supplement (PMC6050085)
Supplement: NIHMS956250-supplement-3.pdf [file NIHMS956250-supplement-3.pdf]

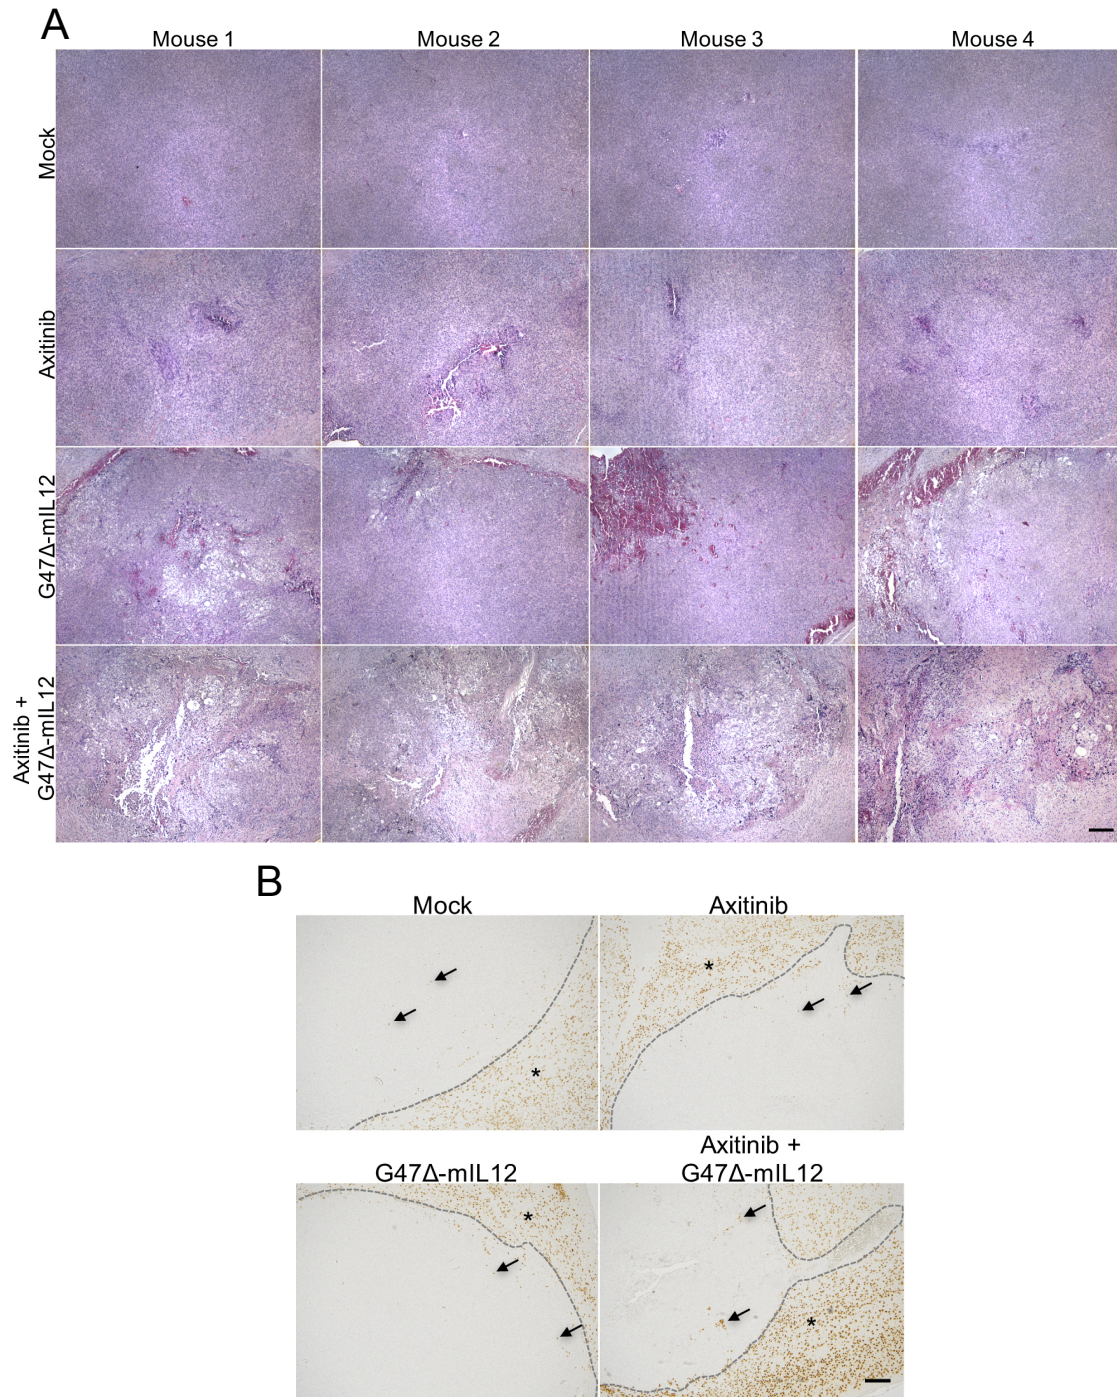

**Supplementary Figure 3. Histopathology of treated human MGG123 GBM.** Same mice from experiment in Fig. 3. **A.** Hematoxylin and eosin staining of brain tumor sections bearing MGG123 GBM tumors. After H & E staining, sections were imaged with 4x objective

and representative tumor images are shown. Bar = 200  $\mu\text{m}$ . **B.** NeuN staining of brain tumor sections bearing MGG123 GBM tumors. Representative images are shown (4x objective). Brown indicates positivity (indicated by arrows). A dotted line separated the tumor from the non-tumor area. Asterisk (\*) indicates non-tumor areas. Bar = 200  $\mu\text{m}$ .
