# Supplementary material
Source: PubMed Central journal article supplement (PMC6050085)
Supplement: NIHMS956250-supplement-6.pdf [file NIHMS956250-supplement-6.pdf]

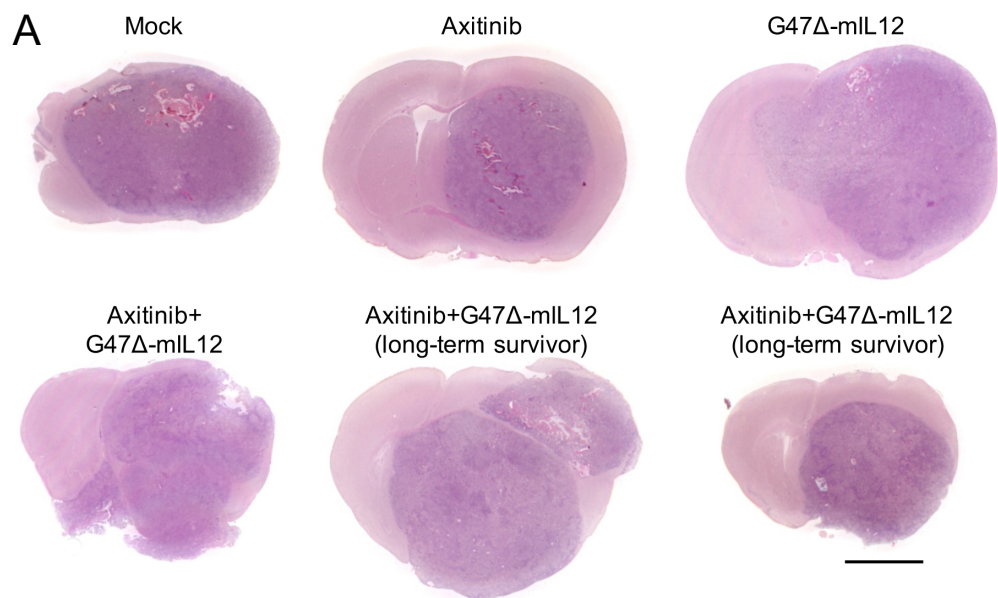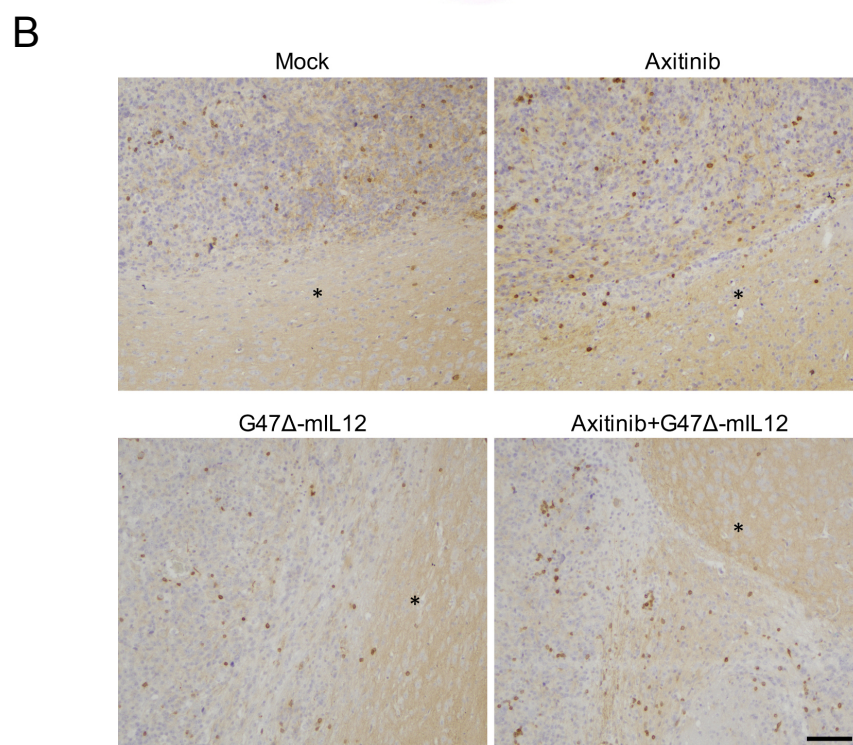

**Supplementary Figure 6. Histopathology of treated mouse 005 GBM.** A. Hematoxylin and eosin staining of mouse brain sections bearing 005 GSC-derived brain tumors. Brain sections from mice in the Fig. 5A experiment. Mice were sacrificed on the following days: Mock, 33; axitinib, 41; G47Δ-mIL12, 37; axitinib + G47Δ-mIL12, 45; long-term survivors

axitinib + G47Δ-mIL12, 71 (lower middle) and 101 (lower right). Bar = 0.1 inch. **B.** Immunohistochemical staining of CD3<sup>+</sup> T cells (in brown) in brain tumor sections from mice in the Fig. 5A experiment. Representative images are shown (10x objective). Images were obtained from the mice that were succumbed to tumor and sacrificed on the following days: Mock, 33; axitinib, 39; G47Δ-mIL12, 37; axitinib + G47Δ-mIL12, 45. \* Non-tumor areas. Bar = 100 μm.
